# Supplementary material for: The Study of the Association of Polymorphisms in LSP1, GPNMB, PDPN, TAGLN, TSPO, and TUBB6 Genes with the Risk and Outcome of Ischemic Stroke in the Russian Population
Source: MDPI journal article supplement (doi:10.3390/ijms24076831), 2023-04-06
Supplement: s1 [file s1]

Supplementary Table S2. Characteristics of genetic models of inheritance tested in the study

| SNP        | a1* | a2 | Additive   | Dominant<br>1, 0 | Recessive<br>1, 0 | Overdominant<br>1, 0 |
|------------|-----|----|------------|------------------|-------------------|----------------------|
| rs858239   | A   | G  | AA, AG, GG | AA/AG, GG        | AA, AG/GG         | AG, AA/GG            |
| rs34323745 | A   | C  | AA, AC, CC | AA/AC, CC        | AA, AC/CC         | AC, AA/CC            |
| rs11267036 | G   | C  | GG, GC, CC | GG/GC, CC        | GG, GC/CC         | GC, GG/CC            |
| rs907611   | A   | G  | AA, AG, GG | AA/AG, GG        | AA, AG/GG         | AG, AA/GG            |
| rs2089910  | A   | G  | AA, AG, GG | AA/AG, GG        | AA, AG/GG         | AG, AA/GG            |
| rs494356   | T   | C  | TT, TC, CC | TT/TC, CC        | TT, TC/CC         | TC, TT/CC            |
| rs664922   | G   | T  | GG, GT, TT | GG/GT, TT        | GG, GT/TT         | GT, GG/TT            |
| rs5759195  | G   | C  | GG, GC, CC | GG/GC, CC        | GG, GC/CC         | GC, GG/CC            |
| rs762959   | T   | C  | TT, TC, CC | TT/TC, CC        | TT, TC/CC         | TC, TT/CC            |
| rs1261025  | G   | A  | GG, GA, AA | GG/GA, AA        | GG, GA/AA         | GA, GG/AA            |
| rs434651   | A   | G  | AA, AG, GG | AA/AG, GG        | AA, AG/GG         | AG, AA/GG            |

\*a1 – minor allele
